# Supplementary material for: NMR Spectroscopy Applied to the Metabolic Analysis of Natural Extracts of Cannabis sativa
Source: MDPI journal article supplement (doi:10.3390/molecules27113509), 2022-05-30
Supplement: s1 [file s1]

Article

# NMR Spectroscopy Applied to the Metabolic Analysis of Natural Extracts of *Cannabis sativa*

Maria Francesca Colella <sup>1</sup>, Rosachiara Antonia Salvino <sup>1</sup>, Martina Gaglianò <sup>1</sup>, Federica Litrenta <sup>2</sup>, Cesare Oliviero Rossi <sup>1</sup>, Adolfo Le Pera <sup>3</sup> and Giuseppina De Luca <sup>1,\*</sup>

<sup>1</sup> Department of Chemistry and Chemical Technologies (CTC), University of Calabria—UNICAL, Via P. Bucci 14C, 87036 Arcavacata di Rende, Italy; mariafrancesca.colella@unical.it (M.F.C.); rosachiara.salvino@unical.it (R.A.S.); martina.gagliano@unical.it (M.G.); cesare.oliviero@unical.it (C.O.R.)

<sup>2</sup> Department of Biomedical, Dental and Morphological and Functional Imaging Sciences (Biomorf), University of Messina, Polo Universitario dell'Annunziata, 98168 Messina, Italy; federica.litrenta@unime.it

<sup>3</sup> Calabria Maceri e Servizi s.p.a., via M. Polo 54, 87036 Rende, Italy; laboratorio@calabramaceri.it

\* Correspondence: giuseppina.deluca@unical.it

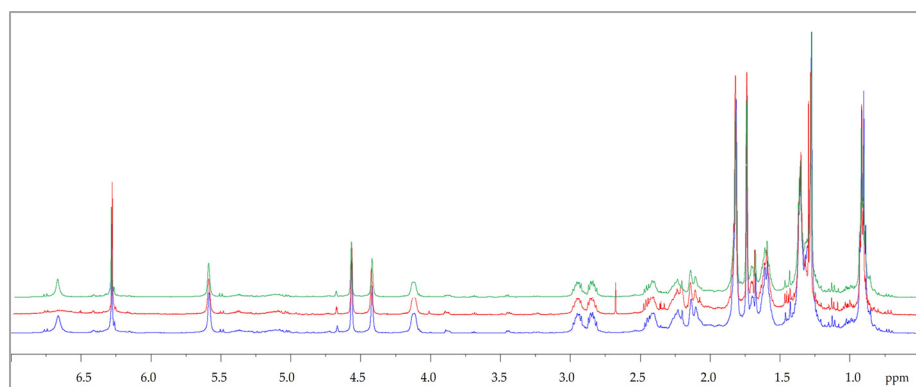

**Figure S1.** Comparison between <sup>1</sup>H NMR spectra of ethanol (blue), acetone (red) and hexane (green) extracts for *Tiborszallasi* variety.

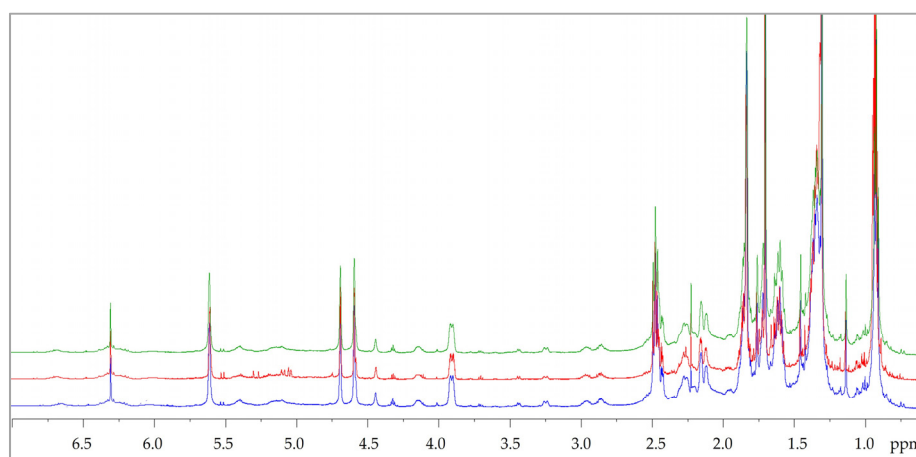

**Figure S2.** Comparison between <sup>1</sup>H NMR spectra of ethanol (blue), hexane (red) and acetone (green) extracts for *Kompolti* variety.

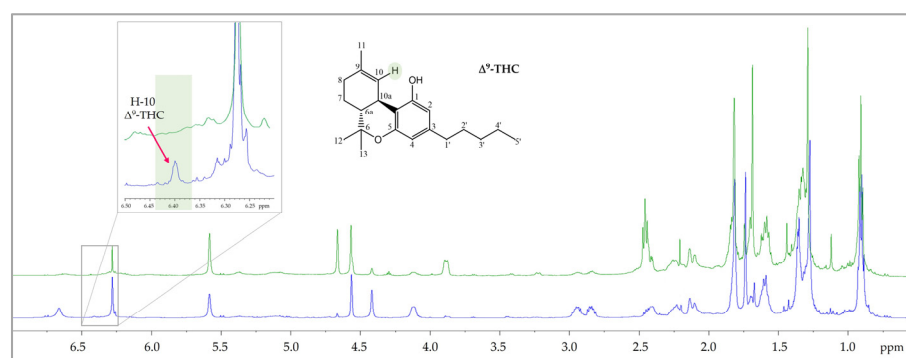

**Figure S3.** Comparison between the enlarged region [6.25 ppm - 6.5ppm] of the  $^1\text{H}$  NMR spectra from hexane extract of *Tiborszallasi* (blue) and *Kompolti* (purple) variety. A broad peak isolated at 6.40 ppm corresponding to the proton H-10 of  $\Delta^9$ -THC appears in the proton spectra of *Tiborszallasi* while this signal was undetectable in the  $^1\text{H}$  NMR spectrum acquired for *Kompolti*.

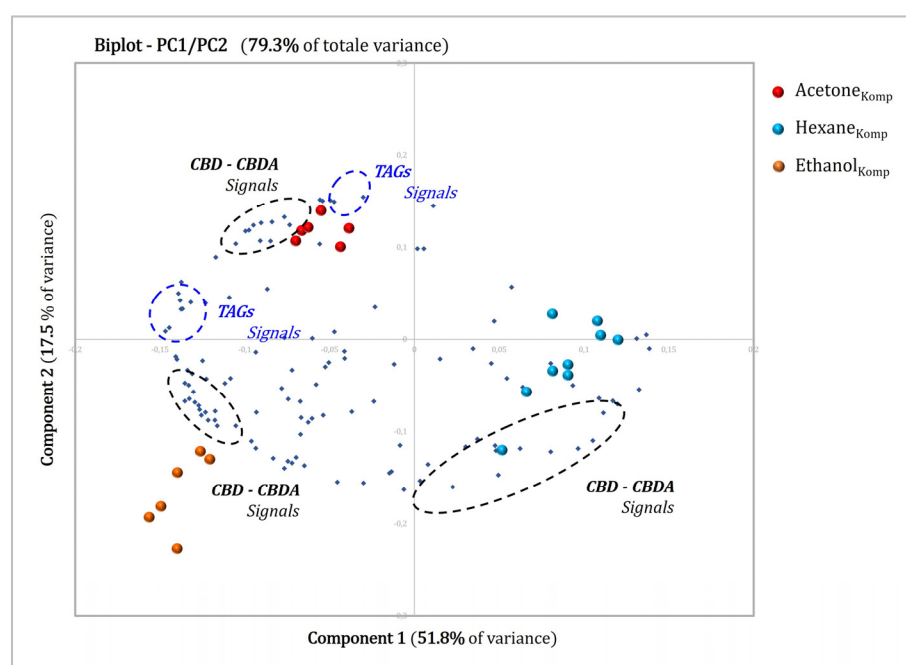

**Figure S4.** Biplot of PCA carried out on NMR spectra of acetone (red dots), hexane (blue dots) and ethanol (orange dots) extracts of *Kompolti* variety of hemp. The scores plot showing the first two PCs (PC1 and PC2) with their respective variation.  $R^2\text{X}(\text{PC1}) = 51.8\%$ ,  $R^2\text{X}(\text{PC2}) = 17.5\%$ .

**Table S1.** The  $^1\text{H}$  NMR data of main cannabinoids in *Kompolti* inflorescences.

| Compound                 | qNMR on Flowers UAE Extracts |               |               |               |
|--------------------------|------------------------------|---------------|---------------|---------------|
|                          | qNMR IS                      | Hexane        | Acetone       | Ethanol       |
| CBDA content*            | Anthracene                   | $0.4 \pm 0.3$ | $0.4 \pm 0.2$ | $0.5 \pm 0.2$ |
|                          | Benzoic acid                 | $0.6 \pm 0.2$ | $0.5 \pm 0.1$ | $0.4 \pm 0.1$ |
|                          | TMSP-d <sub>4</sub>          | $0.4 \pm 0.3$ | $0.4 \pm 0.3$ | $0.5 \pm 0.3$ |
| CBD content*             | Anthracene                   | $5.7 \pm 0.2$ | $5.4 \pm 0.3$ | $5.2 \pm 0.2$ |
|                          | Benzoic acid                 | $5.9 \pm 0.2$ | $5.2 \pm 0.2$ | $5.3 \pm 0.1$ |
|                          | TMSP-d <sub>4</sub>          | $5.9 \pm 0.2$ | $5.6 \pm 0.3$ | $5.3 \pm 0.3$ |
| $\Delta^9$ -THC content* | Anthracene                   |               |               |               |
|                          | Benzoic acid                 | <LOD          | <LOD          | <LOD          |
|                          | TMSP-d <sub>4</sub>          |               |               |               |

\*% on dry weight.
